# Supplementary material
Source: PubMed Central journal article supplement (PMC2077253)
Supplement: pnas_0703228104_13.pdf [file pnas_0703228104_13.pdf]

**Table 1. Data collection, structure solution, and refinement**

|                                                                         | Co, peak data    | Pt, peak data    |
|-------------------------------------------------------------------------|------------------|------------------|
| Data collection                                                         |                  |                  |
| Wavelength, Å                                                           | 1.6059           | 1.0723           |
| Space group                                                             | P2 <sub>1</sub>  | P2 <sub>1</sub>  |
| Unit cell dimension                                                     |                  |                  |
| a, Å                                                                    | 90.1             | 90.3             |
| b, Å                                                                    | 67.3             | 66.8             |
| c, Å                                                                    | 147.7            | 148.4            |
| β, °                                                                    | 96.8             | 97.2             |
| Resolution limit*                                                       | 50–2.5 (2.6–2.5) | 50–3.2 (3.3–3.2) |
| <i>I</i> /σ( <i>I</i> )                                                 | 16.5 (2.2)       | 12 (5.3)         |
| <i>R</i> <sub>merge</sub> , % <sup>†</sup>                              | 7.0 (49.1)       | 7.7 (23.7)       |
| Completeness, %                                                         | 91.1 (54.7)      | 98.4 (99.8)      |
| Redundancy                                                              | 3.5              | 3.6              |
| Structure solution                                                      |                  |                  |
| No. of sites                                                            |                  | 26               |
| Figure of merit <sup>‡</sup>                                            |                  |                  |
| Before DM                                                               |                  | 0.37             |
| After DM                                                                |                  | 0.56             |
| <i>R</i> <sub>Cullis</sub> (centric/acentric/anomalous, %) <sup>§</sup> |                  | 0.58/0.46/0.89   |
| Phasing power (centric/acentric) <sup>¶</sup>                           |                  | 0.98/1.19        |
| Refinement                                                              |                  |                  |
| Resolution range, Å                                                     | 50–2.6           |                  |
| <i>R</i> factor <sup>  </sup>                                           | 21.3             |                  |
| <i>R</i> <sub>free</sub> <sup>**</sup>                                  | 24.9             |                  |
| No. of reflections ( <i>F</i> > 0)                                      | 50,885           |                  |
| Model                                                                   |                  |                  |
| No. of aminoacids                                                       | 1,290            |                  |
| No. of water molecules                                                  | 459              |                  |
| No. of Cbl                                                              | 2                |                  |
| No. of sugars                                                           | 4                |                  |
| Residues in generously allowed regions                                  | 29               |                  |
| Residues in disallowed regions                                          | 0                |                  |
| Stereochemical ideality                                                 |                  |                  |
| Bonds, Å                                                                | 0.01             |                  |
| Angles, °                                                               | 1.874            |                  |
| Dihedral angles, °                                                      | 22.167           |                  |
| Improper angles, °                                                      | 1.127            |                  |

\*Values in parentheses refer to the highest-resolution shell.

<sup>†</sup> $R_{\text{merge}}(I) = \frac{\sum I_i - \langle I \rangle \sum I_i}{\sum I_i}$ , where  $I_i$  is the intensity of the *i*th observation,  $\langle I \rangle$  is the mean intensity of the reflection, and the summation extends over all data.

<sup>‡</sup>Figure of merit is defined as  $\cos(\sigma(\Delta\phi))$ .

<sup>§</sup> $R_{\text{Cullis}}(\text{iso})$  = ratio of lack of closure to isomorphous difference.  $R_{\text{Cullis}}(\text{ano})$  = ratio of lack of closure to anomalous difference.

<sup>¶</sup>Phasing power is the rms ( $|F_{\text{H}}|/E$ ), where  $F_{\text{H}}$  is the calculated structure factor amplitude due to scattering by the heavy atom, and  $E$  is the residual lack of closure error.

<sup>||</sup> $R$  factor =  $\frac{\sum ||F_{\text{O}}| - |F_{\text{C}}||}{\sum |F_{\text{O}}|}$ , where  $F_{\text{O}}$  is observed structure factor amplitude,  $|F_{\text{C}}|$  is calculated structure factor amplitude, and the summation extends over all data.

<sup>\*\*</sup> $R_{\text{free}}$  is the *R* factor obtained for a test set of reflections, consisting of a randomly selected 3% subset (1,529 reflections) of the diffraction data, not used during refinement.
