# Supplementary material
Source: PubMed Central journal article supplement (PMC2077253)

R = CN, OH, CH<sub>3</sub> or Deoxyadenosyl

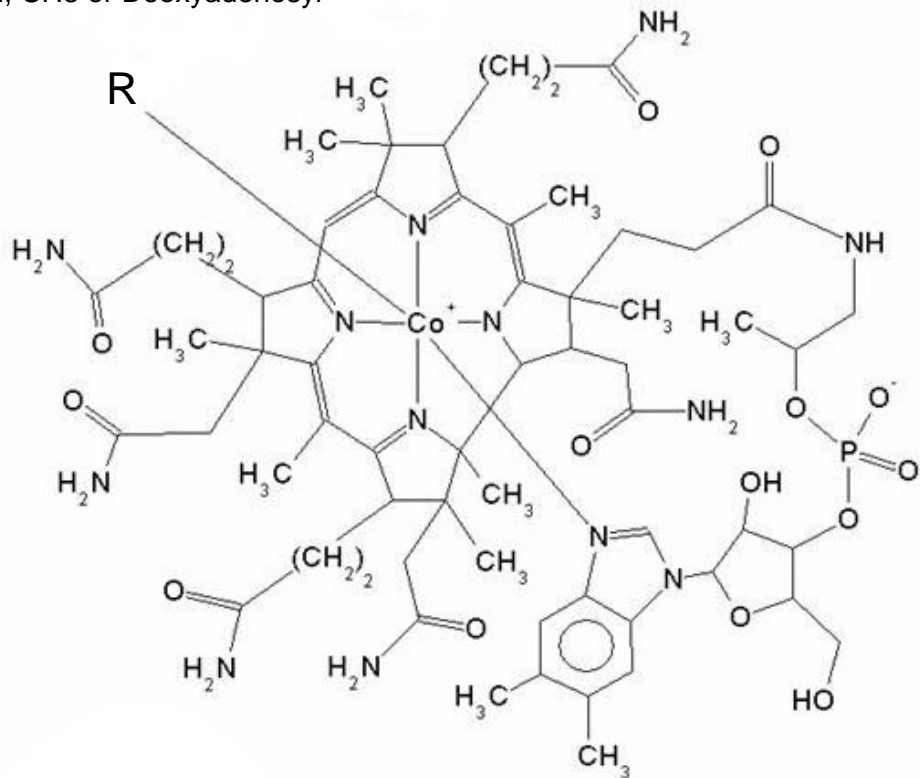

Dimethylbenzimidazole

Supplement: pnas_0703228104_1.pdf [file pnas_0703228104_1.pdf]

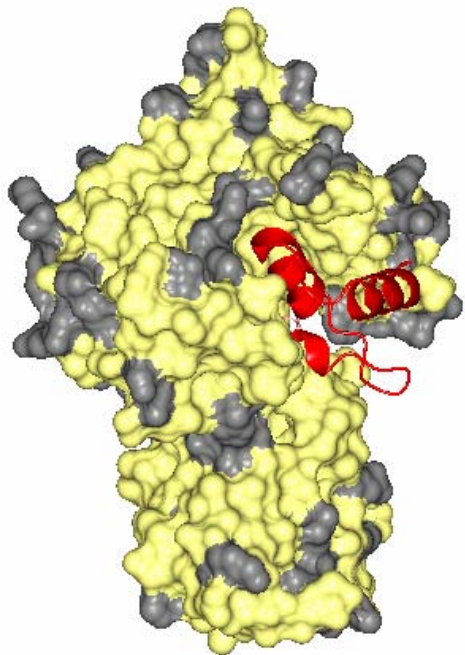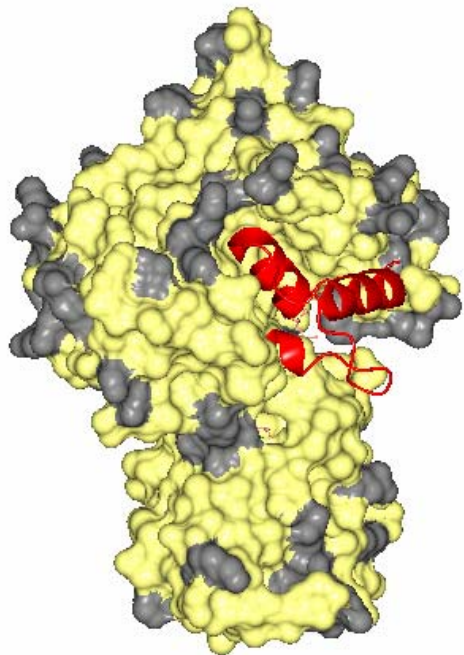

Supplement: pnas_0703228104_10.pdf [file pnas_0703228104_10.pdf]

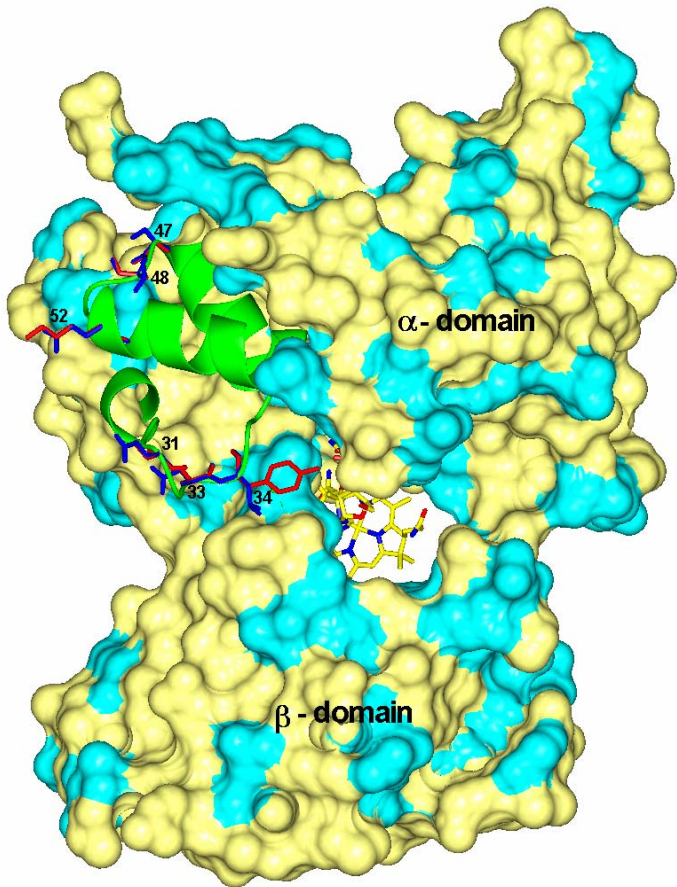

Supplement: pnas_0703228104_11.pdf [file pnas_0703228104_11.pdf]

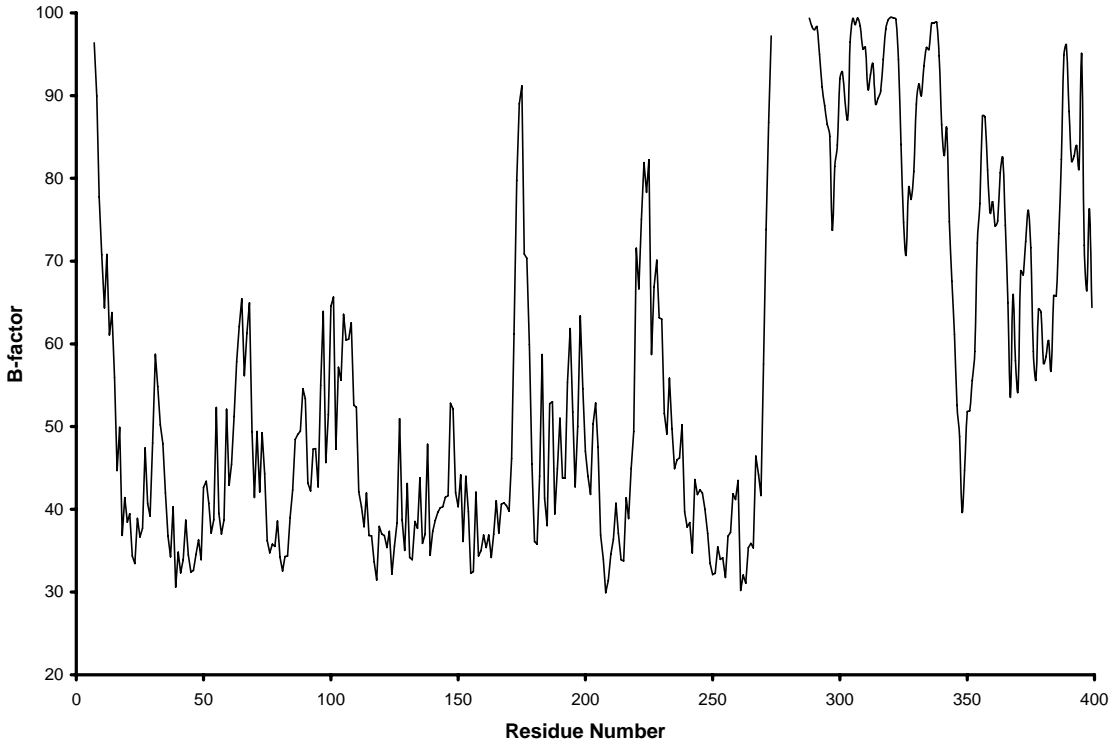

Supplement: pnas_0703228104_2.pdf [file pnas_0703228104_2.pdf]

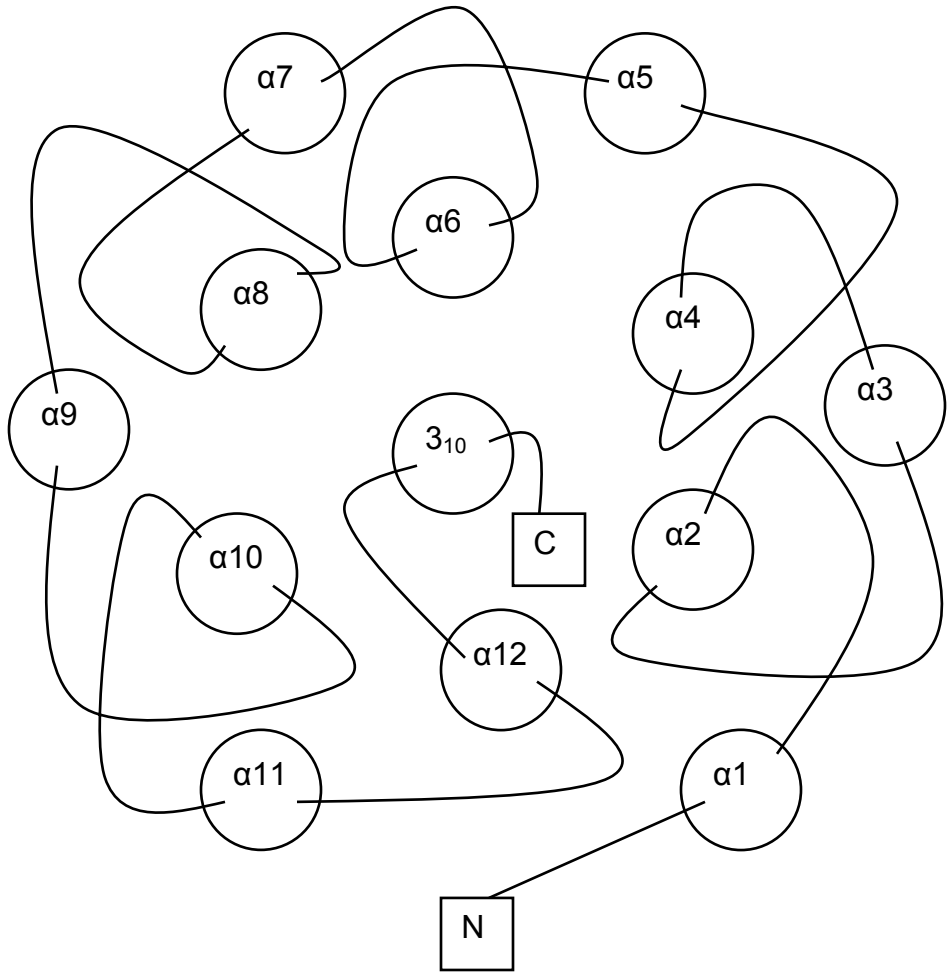

Supplement: pnas_0703228104_3.pdf [file pnas_0703228104_3.pdf]

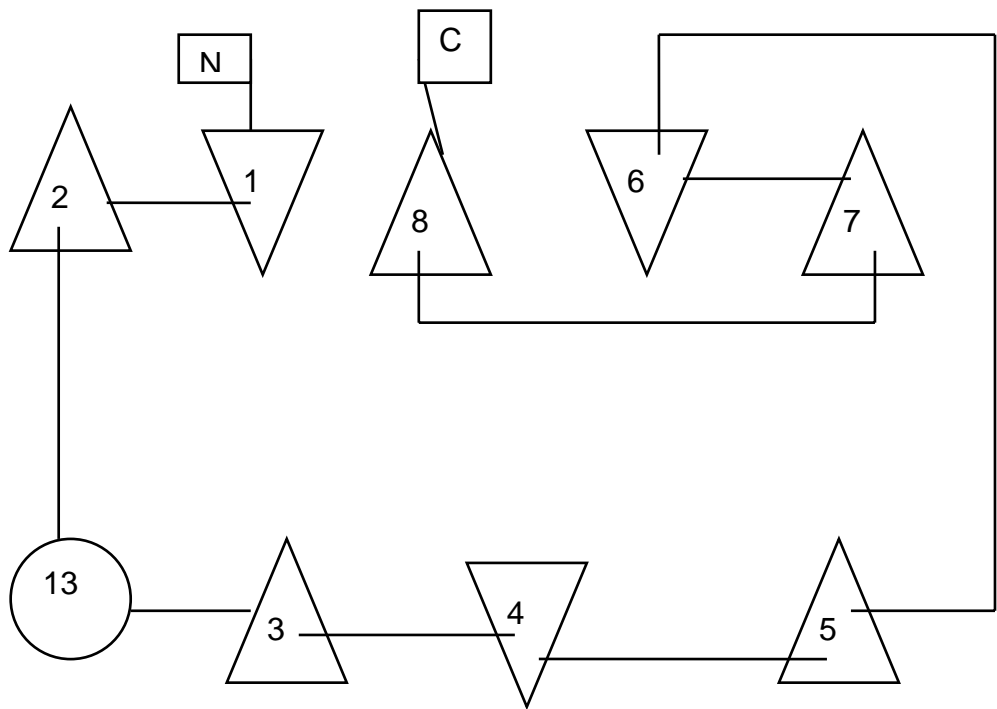

Supplement: pnas_0703228104_4.pdf [file pnas_0703228104_4.pdf]

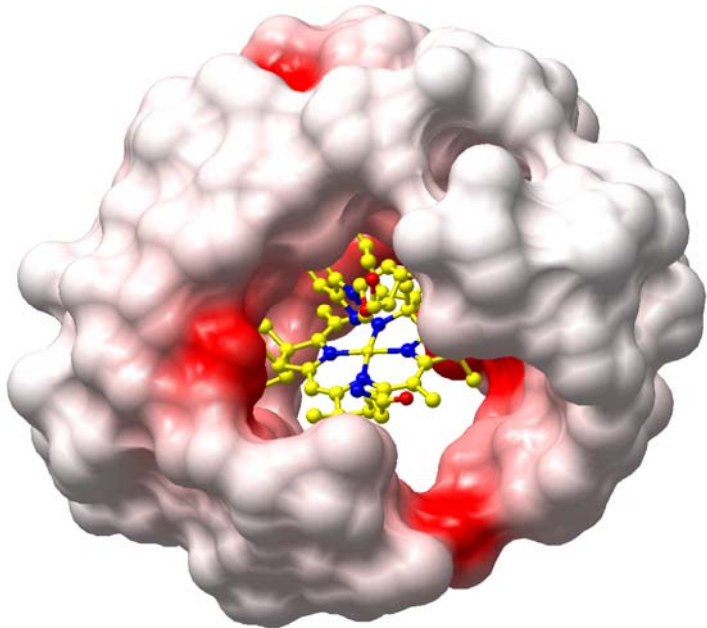

Supplement: pnas_0703228104_5.pdf [file pnas_0703228104_5.pdf]

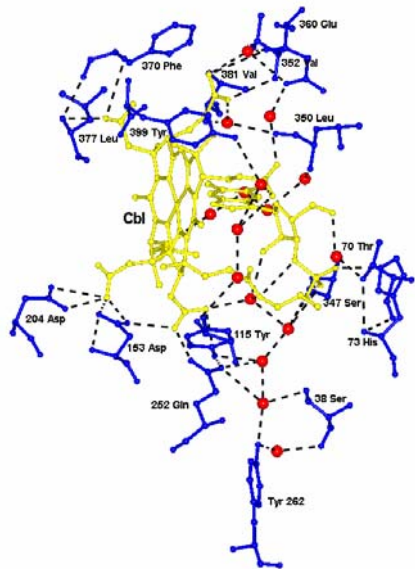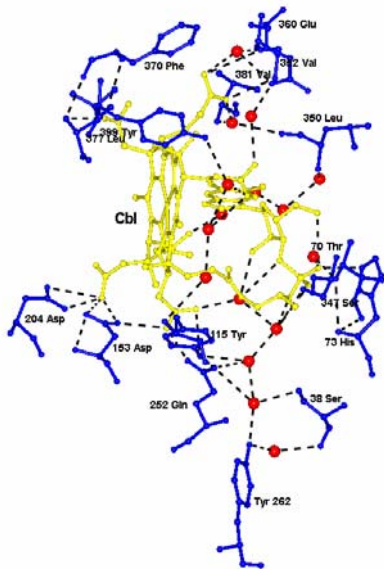

Supplement: pnas_0703228104_6.pdf [file pnas_0703228104_6.pdf]

$\beta$  - domain

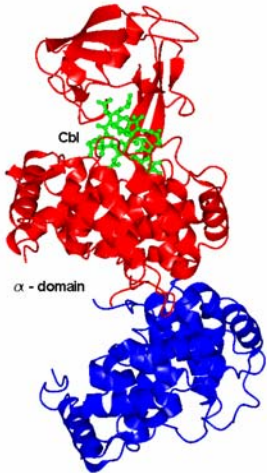

$\beta$  - domain

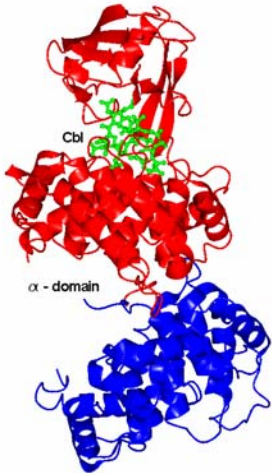

Supplement: pnas_0703228104_7.pdf [file pnas_0703228104_7.pdf]

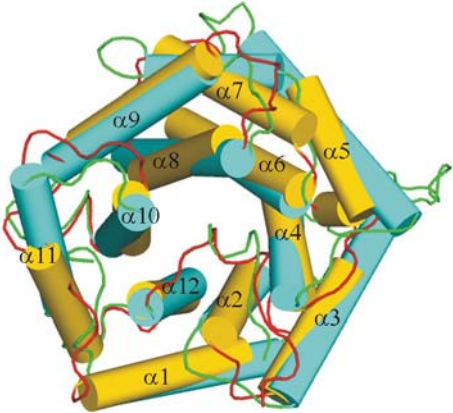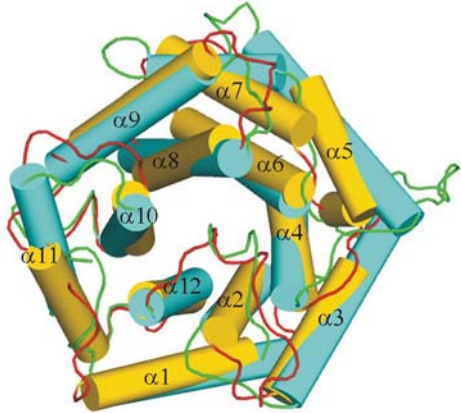

Supplement: pnas_0703228104_8.pdf [file pnas_0703228104_8.pdf]

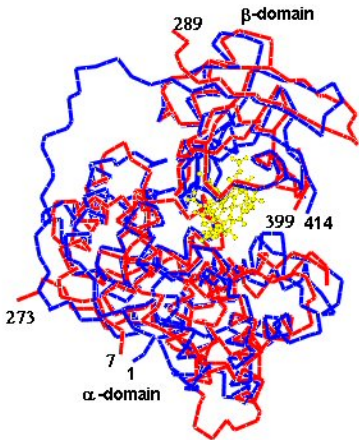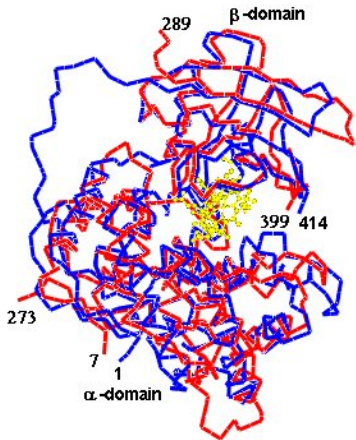

Supplement: pnas_0703228104_9.pdf [file pnas_0703228104_9.pdf]
